# Supplementary material for: Switching and fluorescence signal amplification with metal ions in allosteric systems based on 1, 3-alternate thiacalix[4]crown
Source: Royal Society of Chemistry journal article supplement (doi:10.1039/c0dt00702a), 2010-01-01
Supplement: c0dt00702a.pdf [file c0dt00702a.pdf]

## Supporting Information

### Switching and Fluorescence Signal Amplification with Metal Ions in Allosteric Systems Based on 1, 3-Alternate Thiacalix[4]crown

*Manoj Kumar\**, *Vandana Bhalla*, *Abhimanew Dhir*

Department of Chemistry, UGC Centre for Advanced Studies,  
Guru Nanak Dev University, Amritsar, Punjab -143005- INDIA

- 3** Synthetic details of **7** and **8**.
- 4** Job's Plot of **4** with  $\text{Fe}^{3+}$  ions.
- 5** Fluorescence spectra of **7** in response to the presence of  $\text{Fe}^{3+}$  ions.
- 6** Reversibility of  $\text{Fe}^{3+}$  coordination to **4** by TBACl.
- 7** Job's Plot of **5** with  $\text{Hg}^{2+}$  ions.
- 8** Fluorescence spectra of **8** in response to the presence of  $\text{Hg}^{2+}$  ions.
- 9** Reversibility of  $\text{Hg}^{2+}$  coordination to **5** by TBAI.
- 10** Fluorescent response of sensor **4** to  $\text{Fe}^{3+}$  over other selected metal ions.
- 11** Fluorescent response of sensor **5** to  $\text{Hg}^{2+}$  over other selected metal ions.
- 12** Fluorescence spectra of **4** ( $1 \times 10^{-5}$  M) in response to the presence of  $\text{K}^{+}$  ions.
- 13** Fluorescence spectra of **5** ( $1 \times 10^{-5}$  M) in response to the presence of  $\text{K}^{+}$  ions.
- 14** Fluorescence emission spectra of **4** on addition of  $\text{K}^{+}$  ions and further addition of  $\text{Fe}^{3+}$  ions.
- 15** Fluorescence emission spectra of **5** on addition of  $\text{K}^{+}$  ions and further addition of  $\text{Hg}^{2+}$  ions.
- 16** UV-vis spectra of **4** in response to the presence of  $\text{Fe}^{3+}$  ions.

- 17 UV-vis spectra of **4** in response to the presence of various metal ions.
- 18 UV-vis spectra of **5** in response to the presence of **Hg<sup>2+</sup>** ions.
- 19 UV-vis spectra of **5** in response to the presence of various metal ions.
- 20 <sup>1</sup>H NMR spectra of **5** in CDCl<sub>3</sub>/CD<sub>3</sub>CN (8:2). (A) Free ligand (B) in presence of 1.0 equiv of mercury perchlorate; (C) in presence of 1.0 equiv of potassium perchlorate; (D) addition of 1.0 equiv of mercury perchlorate to ligand/potassium complex.
- 21 <sup>1</sup>H NMR Spectrum of **4**.
- 22 <sup>13</sup>C NMR Spectrum of **4**.
- 23 Mass Spectrum of **4**.
- 24 <sup>1</sup>H NMR Spectrum of **5**.
- 25 <sup>13</sup>C NMR Spectrum of **5**.
- 26 Mass Spectrum of **5**.
- 27 <sup>1</sup>H NMR Spectrum of **7**.
- 28 Mass Spectrum of **7**.
- 29 <sup>1</sup>H NMR Spectrum of **8**.
- 30 Mass Spectrum of **8**.
- 31 IR Spectrum of **4**.
- 32 IR Spectrum of **5**.
- 33 SPECFIT data of **4**.
- 34 SPECFIT data of **5**.
- 35 Table S1 for quantum yield values.
- 36 Fitting curves for **4.Fe<sup>3+</sup>** and **5.Hg<sup>2+</sup>** complex superimposed with experimental data.

**25,27-Bis[2-(anthracenyl)iminoethoxy]-26,28-dipropoxythiacalix[4]arene in 1,3-alternate conformation[7]:**

To a solution of diamine **6** (0.10 g, 0.11 mmol) in a 1:1 mixture of chloroform and methanol (20 mL) was added a solution of 9-anthracene carbaldehyde (0.048 g, 0.21 mmol) in methanol (5 mL). The mixture was stirred for 24 h to separate a solid, which was filtered, washed and recrystallized from chloroform and methanol. The compound **4** was obtained in 81 % yield (0.115 g,) mp. 235°C.;  $\nu_{\max}$  (KBr pellet,  $\text{cm}^{-1}$ ) 1635  $\text{cm}^{-1}$ ;  $^1\text{H}$  NMR ( $\text{CDCl}_3$ , 300 MHz):  $\delta$  = 1.26 [s, 18 H, C(CH<sub>3</sub>)<sub>3</sub>], 1.32 [s, 18 H, C(CH<sub>3</sub>)<sub>3</sub>], 0.67 [t,  $J$  = 6.9 Hz, 6 H, CH<sub>3</sub>], 1.072 -1.186 [m, 4H, CH<sub>2</sub>], 3.66 [t,  $J$  = 7.2 Hz, 4H, NCH<sub>2</sub>], 3.90 [t,  $J$  = 7.5 Hz, 4 H, OCH<sub>2</sub> ], 4.45 [t,  $J$  = 8.25 Hz, 4H, OCH<sub>2</sub>], 7.39 [s, 4H, ArH], 7.58 [s, 4H, ArH], 7.30 – 7.50 ( m, 8H, ArH), 7.99 [d,  $J$  = 8.1, 4H, ArH], 8.43 [d,  $J$  = 8.4, 4H, ArH], 8.49 [s, 2H, ArH], 9.45 [s, 2H, HC = N]; FAB-MS  $m/z$  1267 (M+1)<sup>+</sup>; Elemental Analysis Calcd for C<sub>80</sub>H<sub>86</sub>N<sub>2</sub>O<sub>4</sub>S<sub>4</sub>: C, 75.82 % ; H, 6.95 % ; N, 2.21 % ; Found: C, 75.47 % ; H, 6.85 % ; N, 2.10%.

**25,27-Bis[2-(anthracenyl)iminoethoxy]-26,28-dipropoxythiacalix[4]arene in 1,3-alternate conformation[8]:**

To a solution of diamine **6** (0.10 g, 0.11 mmol) in a 1:1 mixture of chloroform and methanol (20 mL) was added a solution of 2-quinoline carboxaldehyde (0.037 g, 0.21 mmol) in methanol (5 mL). The mixture was stirred for 24 h to separate a solid, which was filtered, washed and recrystallized from chloroform and methanol. The compound **8** was obtained in 83% yield (0.11 g,) mp. 242°C;  $\nu_{\max}$  (KBr pellet,  $\text{cm}^{-1}$ ) 1635  $\text{cm}^{-1}$ ;  $^1\text{H}$  NMR ( $\text{CDCl}_3$ , 300 MHz):  $\delta$  = 1.26 [s, 18 H, C(CH<sub>3</sub>)<sub>3</sub>], 1.31 [s, 18 H, C(CH<sub>3</sub>)<sub>3</sub>], 0.65 [t,  $J$  = 7.5 Hz, 6H, CH<sub>3</sub>], 1.08 -1.27 [m, 4H, CH<sub>2</sub>], 3.40 [t,  $J$  = 7.5 Hz, 4H, NCH<sub>2</sub>], 3.87 [t,  $J$  = 7.5 Hz, 4H, OCH<sub>2</sub> ], 4.25 [t,  $J$  = 7.5 Hz, 4H, OCH<sub>2</sub>], 7.27 [s, 4H, ArH], 7.33 [s, 4H, ArH], 7.50 – 7.70 ( m, 2H, ArH), 7.71 – 7.74 (m, 2H, ArH), 7.82 (d,  $J$  = 6 Hz, 2H, ArH) 8.03 – 8.20 (m, 4H, ArH), 8.32 [d,  $J$  = 9 Hz, 2H, ArH], 8.48 [s, 2H, HC = N]; FAB-MS  $m/z$  1169 (M+1)<sup>+</sup>; Elemental Analysis Calcd for C<sub>82</sub>H<sub>88</sub>N<sub>2</sub>O<sub>7</sub>S<sub>4</sub>: C, 71.92 % ; H, 6.84 % ; N, 4.79 % ; Found: C, 71.97 % ; H, 6.66 % ; N, 4.59 %.

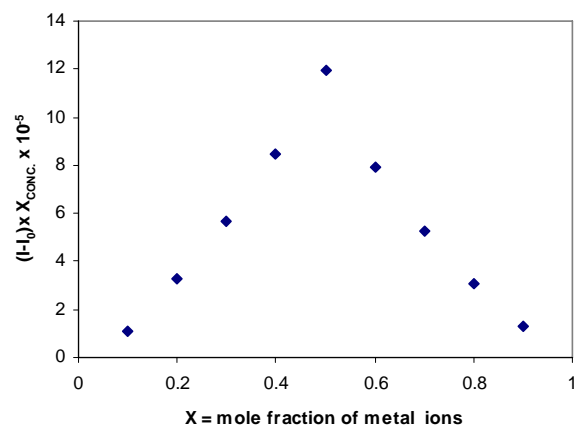

**Figure S1.** Job's plot of **4** with Fe<sup>3+</sup> representing stoichiometry 1:1 (host: guest).

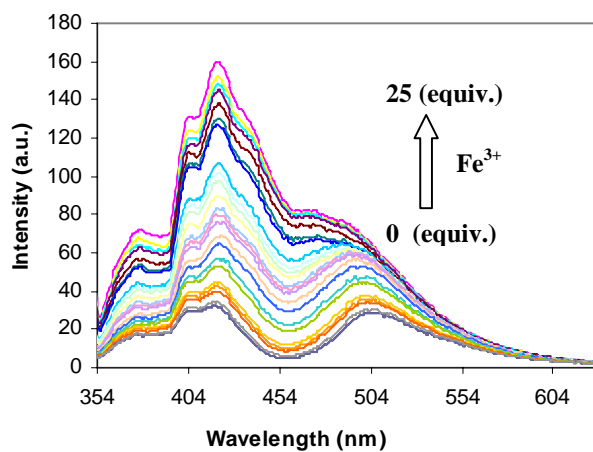

**Figure S2.** Fluorescence spectra of **7** ( $1 \times 10^{-5}$  M) in response to the presence of  $\text{Fe}^{3+}$  ions (25 equiv.) in THF;  $\lambda_{\text{ex}} = 340$  nm

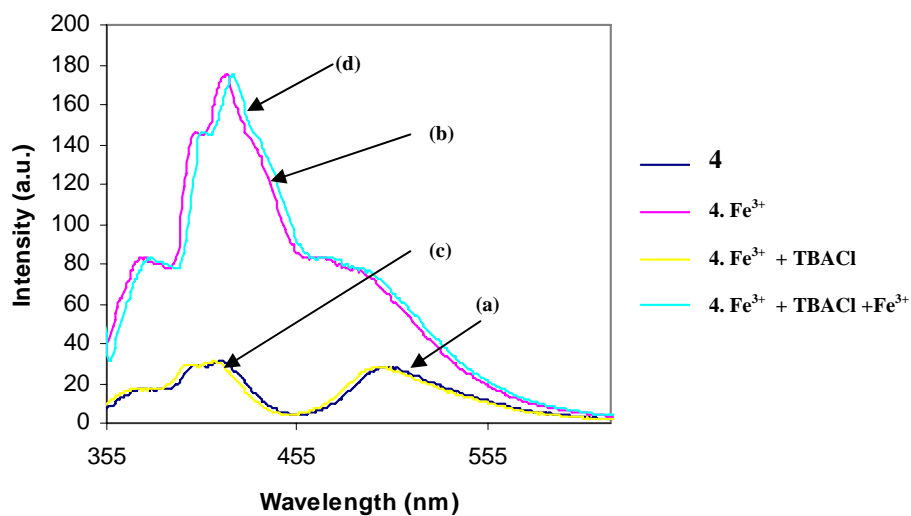

**Figure S3.** Reversibility of Fe<sup>3+</sup> coordination to **4** by Tetrabutyl ammonium chloride (TBACl). (a) **4** ( $1 \times 10^{-5}$  M); (b) **4** + 20 equiv. Fe<sup>3+</sup>; (c) **4** + 20 equiv. Fe<sup>3+</sup> + 12 equiv. TBACl; (d) **4** + 20 equiv. Fe<sup>3+</sup> + 12 equiv. TBACl + 30 equiv. Fe<sup>3+</sup>.

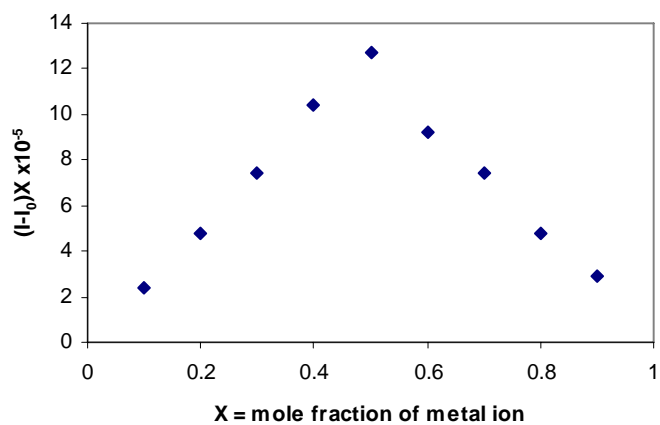

**Figure S4.** Job's plot of **5** with **Hg<sup>2+</sup>** representing stoichiometry 1:1 (host: guest).

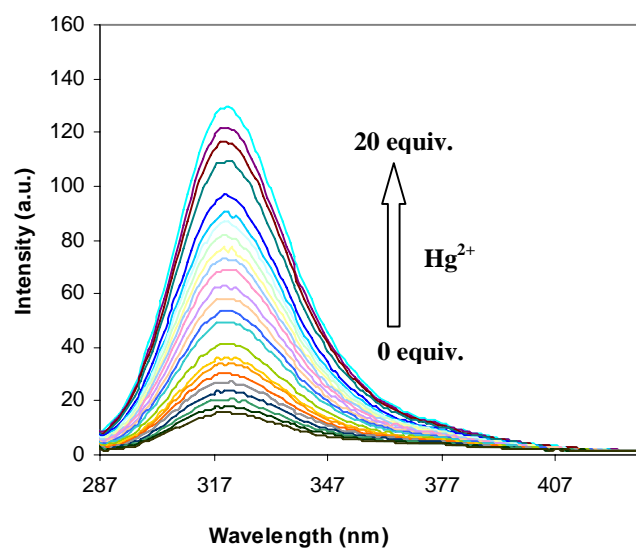

**Figure S5.** Fluorescence spectra of **8** ( $1 \times 10^{-5}$  M) in response to the presence of **Hg<sup>2+</sup>** ions (20 equiv.) in THF;  $\lambda_{\text{ex}} = 245$  nm.



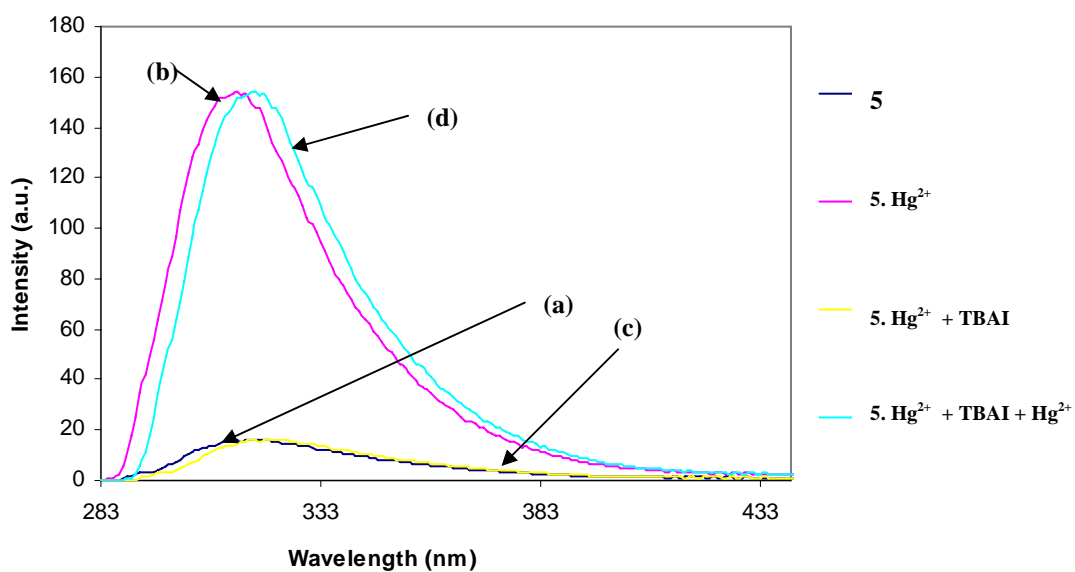

**Figure S6.** Reversibility of  $\text{Hg}^{2+}$  coordination to **5** by Tetrabutyl ammonium iodide (TBAI). (a) **5** ( $1 \times 10^{-5}$  M); (b) **5** + 16 equiv.  $\text{Hg}^{2+}$ ; (c) **5** + 16 equiv.  $\text{Hg}^{2+}$  + 15 equiv. TBAI); (d) **5** + 16 equiv.  $\text{Hg}^{2+}$  + 15 equiv. TBAI) + 20 equiv.  $\text{Hg}^{2+}$ .

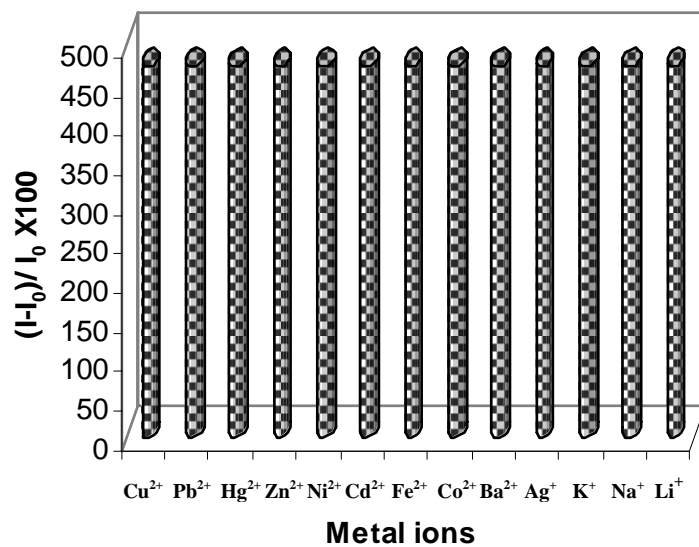

**Figure S7.** Fluorescent response of sensor **4** ( $1 \times 10^{-5}$  M) to **Fe<sup>3+</sup>** (20 equiv.) ions over other selected metal ions (100 equiv.).

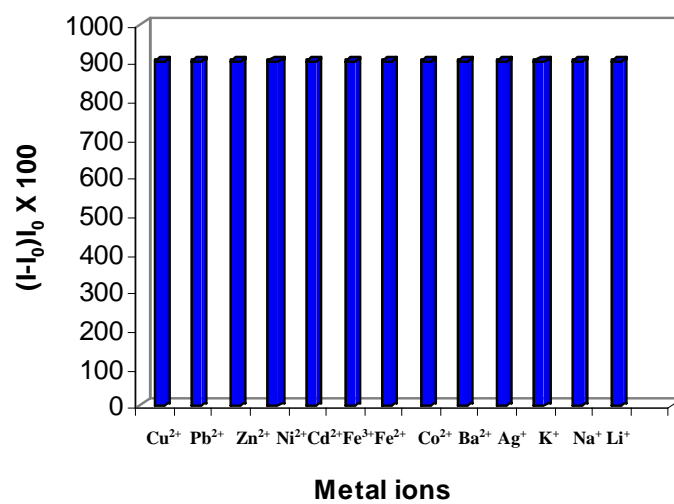

**Figure S8.** Fluorescent response of sensor **5** ( $1 \times 10^{-5}$  M) to  $\text{Hg}^{2+}$  (16 equiv.) ions over other selected metal ions (100 equiv.).

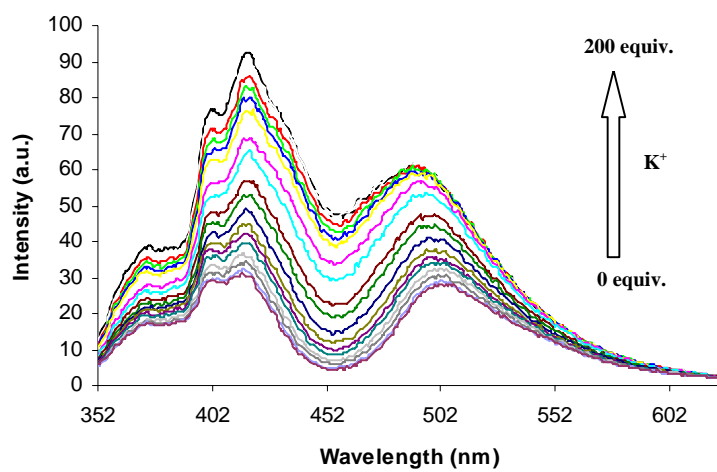

**Figure S9.** Fluorescence spectra of **4** ( $1 \times 10^{-5}$  M) in response to the presence of **K<sup>+</sup>** ions (200 equiv.) in THF;  $\lambda_{\text{ex}} = 340$  nm.

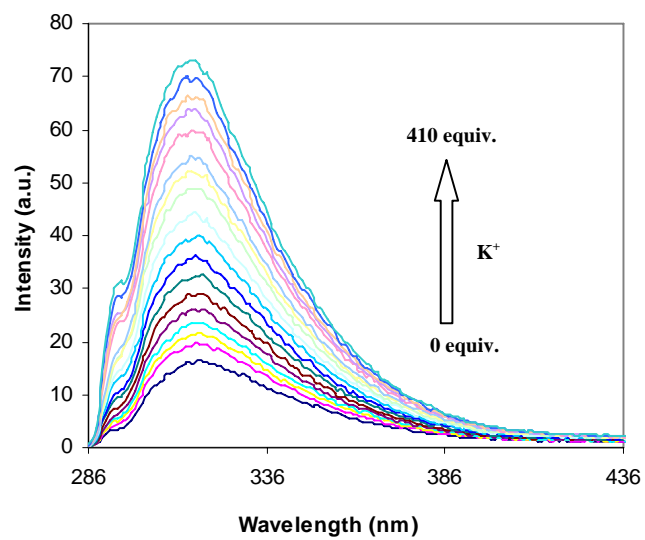

**Figure S 10.** Fluorescence spectra of **5** ( $1 \times 10^{-5}$  M) in response to the presence of  $\text{K}^+$  ions (410 equiv.) in THF;  $\lambda_{\text{ex}} = 245$  nm.

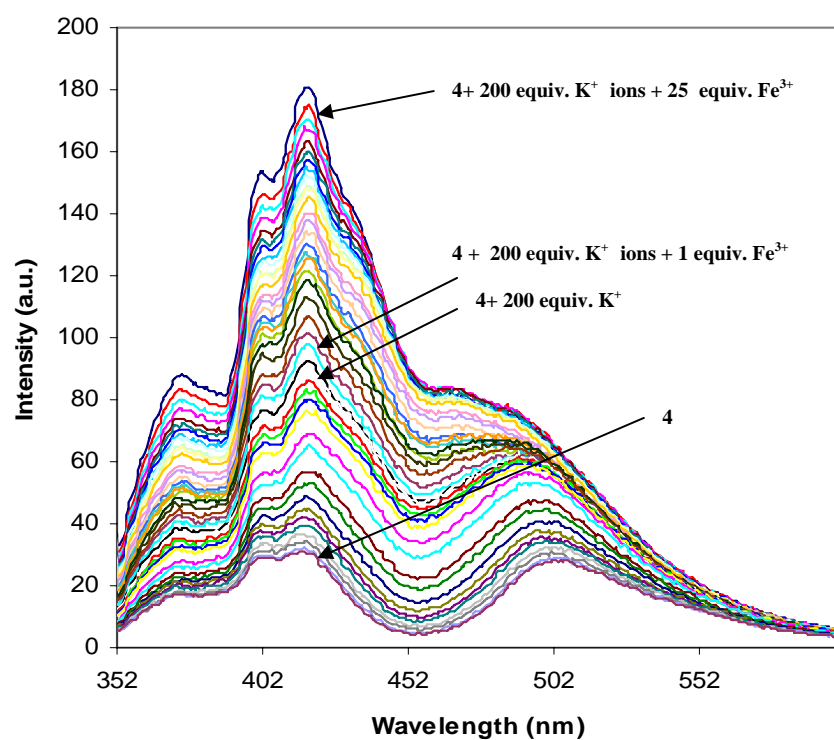

**Figure S11.** Fluorescence emission spectra of **4** ( $1 \times 10^{-5}$  M) on addition of  $\text{K}^+$  ions (200 equiv.) and further addition of  $\text{Fe}^{3+}$  ions (25 equiv.) .

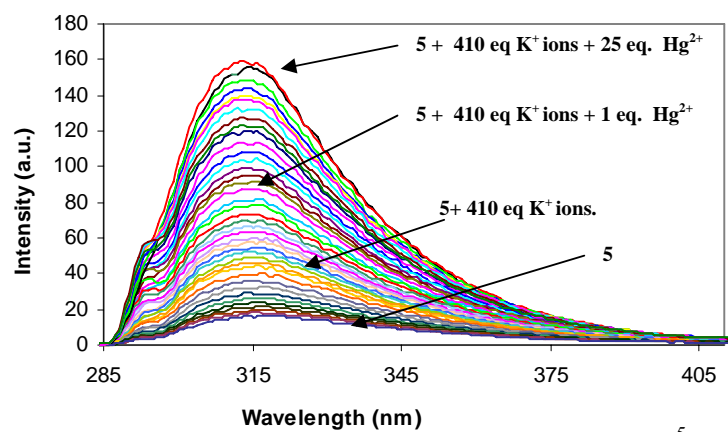

**Figure S12.** Fluorescence emission spectra of **5** ( $1 \times 10^{-5}$  M) on addition of  $K^+$  ions (410 equiv.) and further addition of  $Hg^{2+}$  ions (25 equiv.).

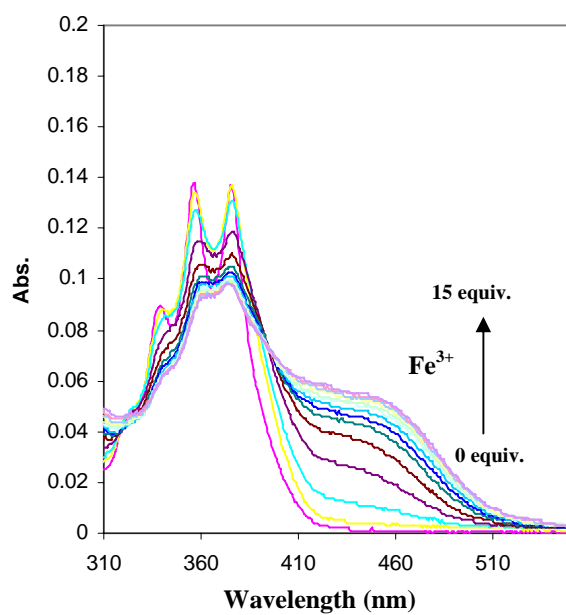

**Figure S13.** UV-vis spectra of **4** ( $1 \times 10^{-5}$  M) in response to the presence of  $\text{Fe}^{3+}$  ions (15 equiv.) in THF.



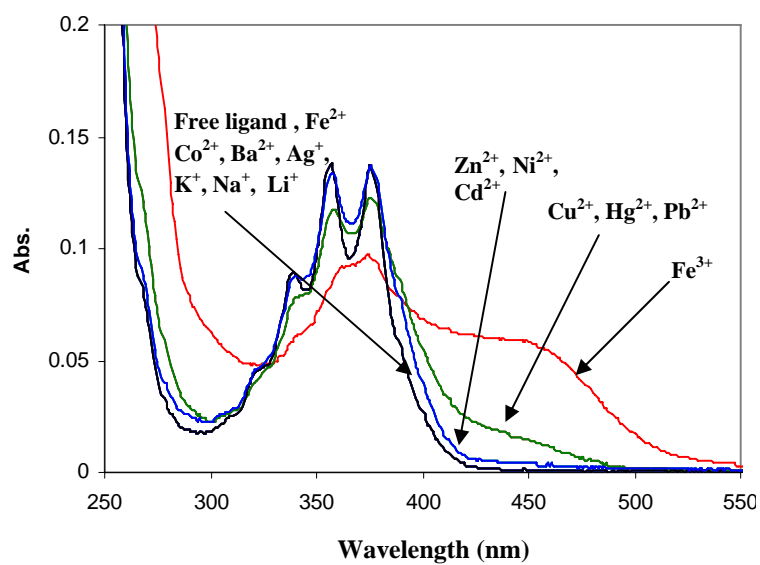

**Figure S14.** UV-vis spectra of **4** (1 × 10<sup>-5</sup> M) in response to the presence of various metal ions (15 equiv.) in THF.

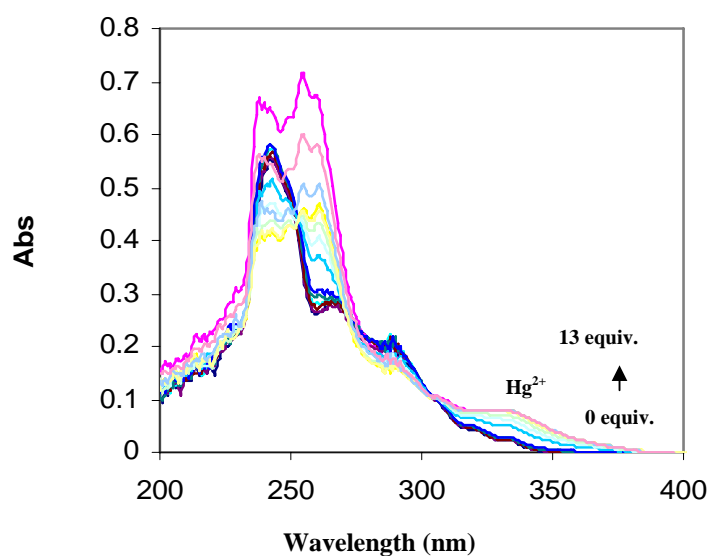

**Figure S15.** UV-vis spectra of **5** ( $1 \times 10^{-5}$  M) in response to the presence of  $\text{Hg}^{2+}$  ions (13 equiv.) in THF.

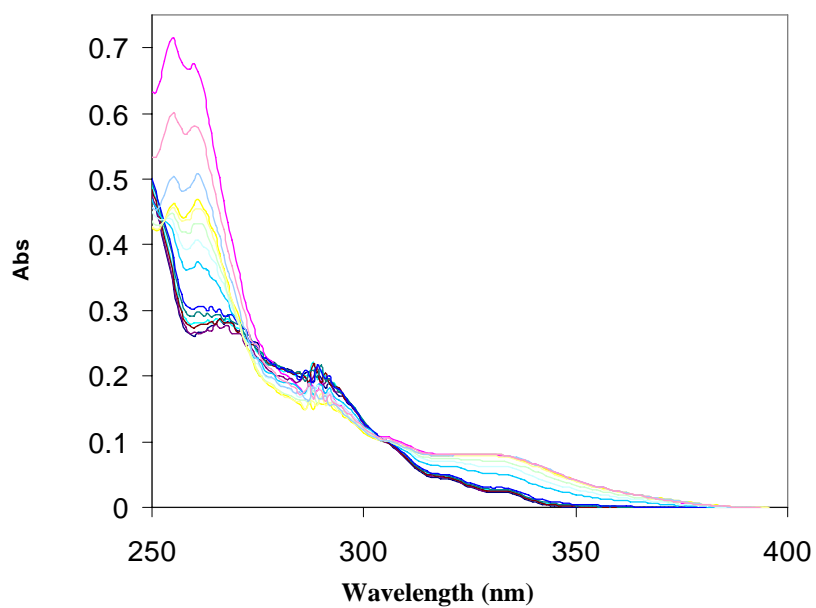

**Figure S15.** Figure Magnified view of above figure.

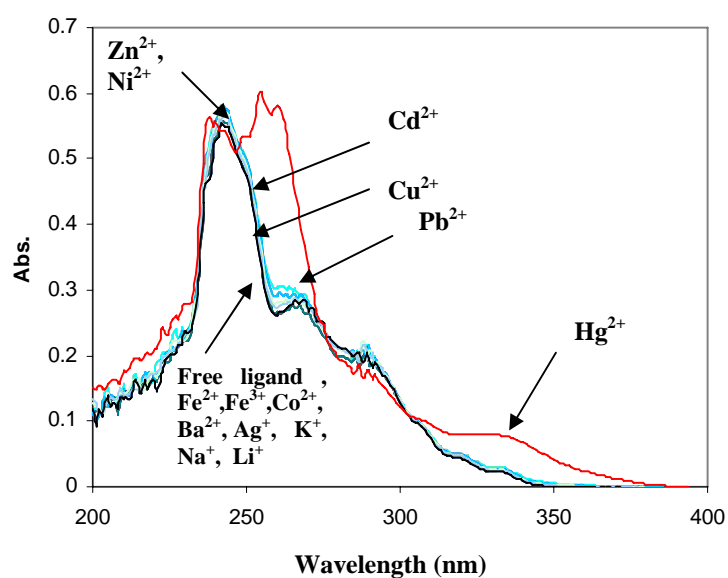

**Figure S16.** UV-vis spectra of **5** ( $1 \times 10^{-5}$  M) in response to the presence of ions various metal ions (13 equiv.) in THF.

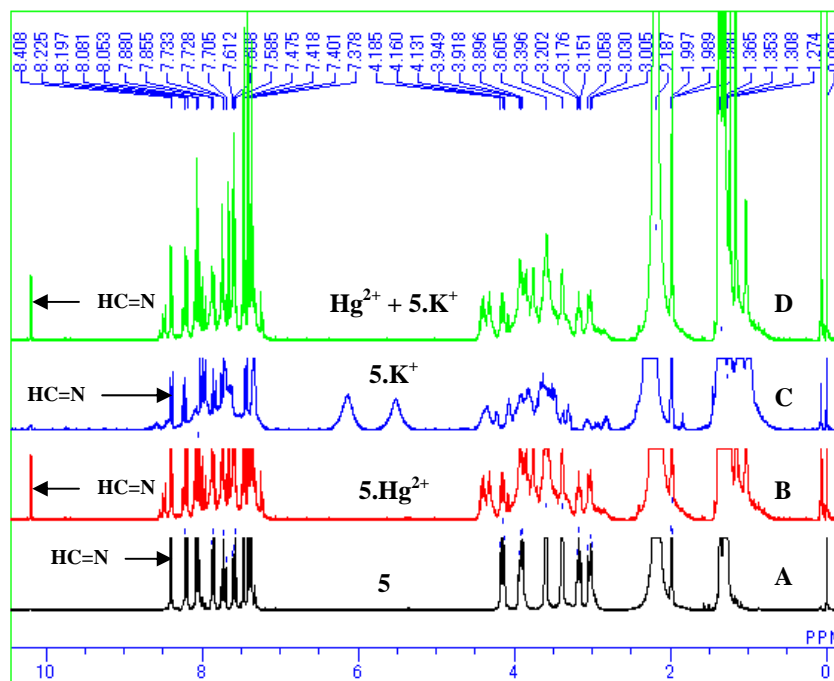

**Figure S17.**  $^1\text{H}$  NMR spectra of **5** in  $\text{CDCl}_3/\text{CD}_3\text{CN}$  (8:2). (A) Free ligand (B) in presence of 1.0 equiv of mercury perchlorate; (C) in presence of 1.0 equiv of potassium perchlorate; (D) addition of 1.0 equiv of mercury perchlorate to ligand/potassium complex. NMR frequency is 300 MHz.

Figure S18.  $^1\text{H}$  NMR Spectrum of **4**

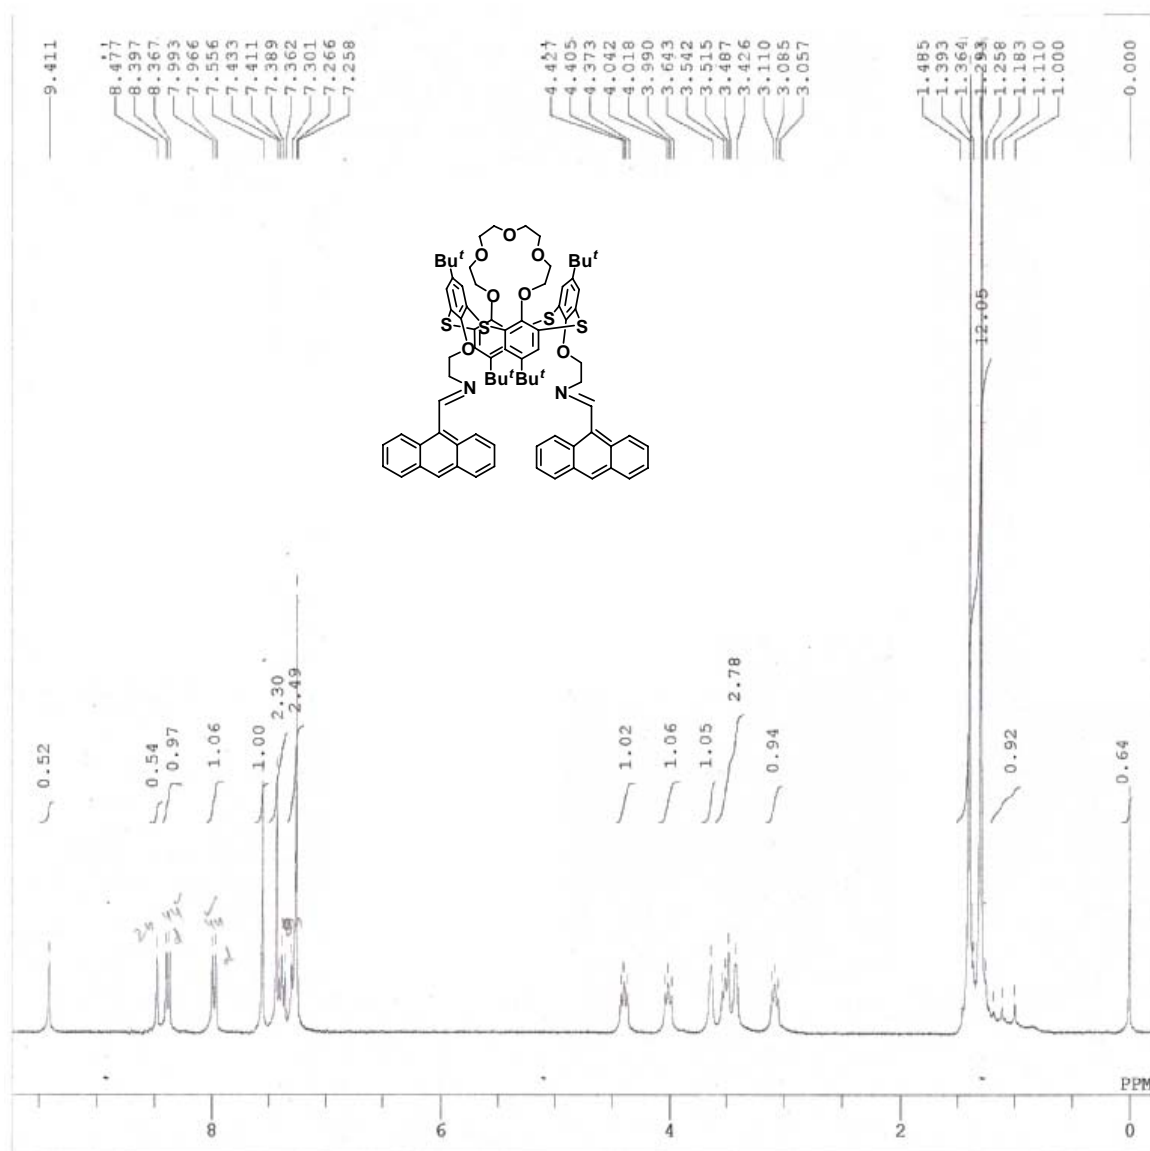

Figure S19.  $^{13}\text{C}$  NMR Spectrum of **4**

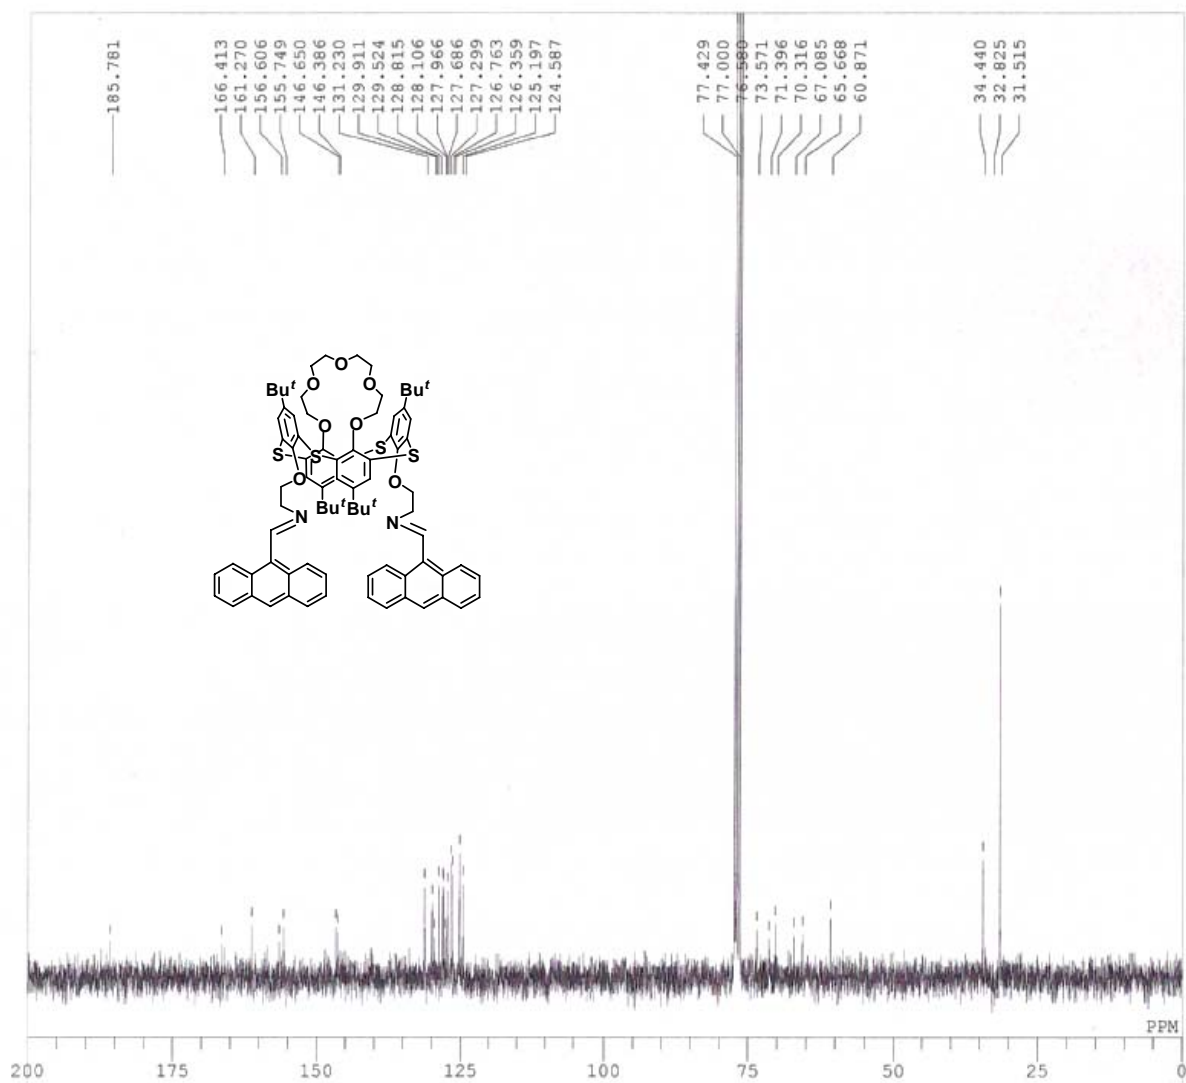

**Figure S20. Mass Spectrum of 4**

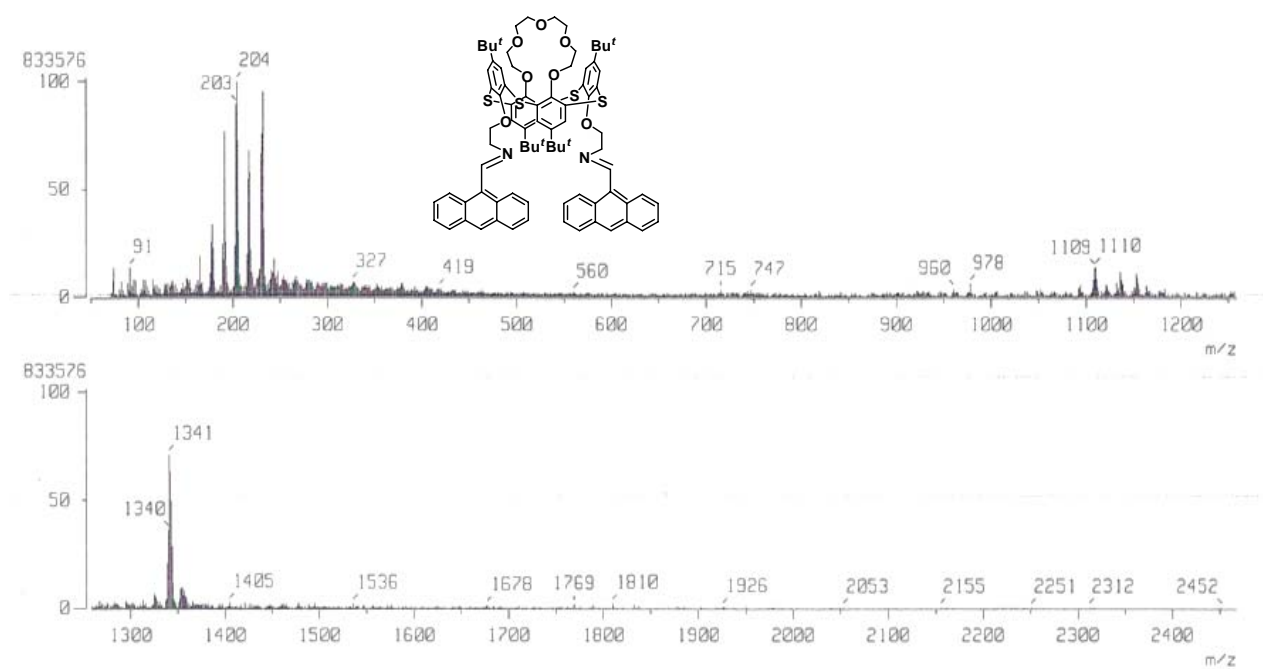

Figure S21.  $^1\text{H}$  NMR Spectrum of 5

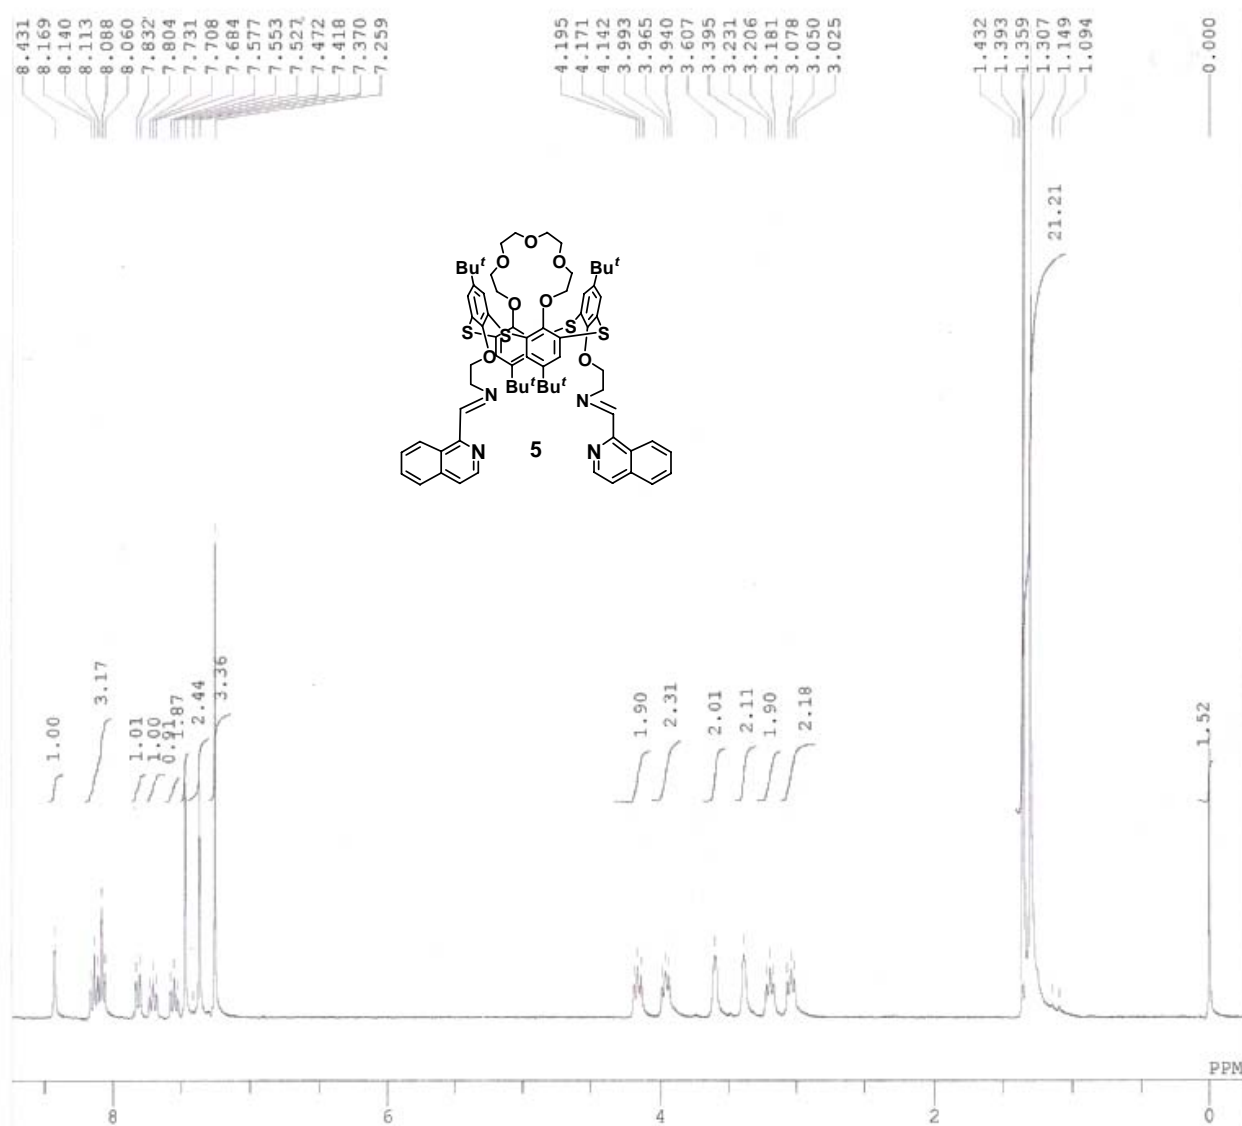



Figure S22.  $^{13}\text{C}$  NMR Spectrum of **5**

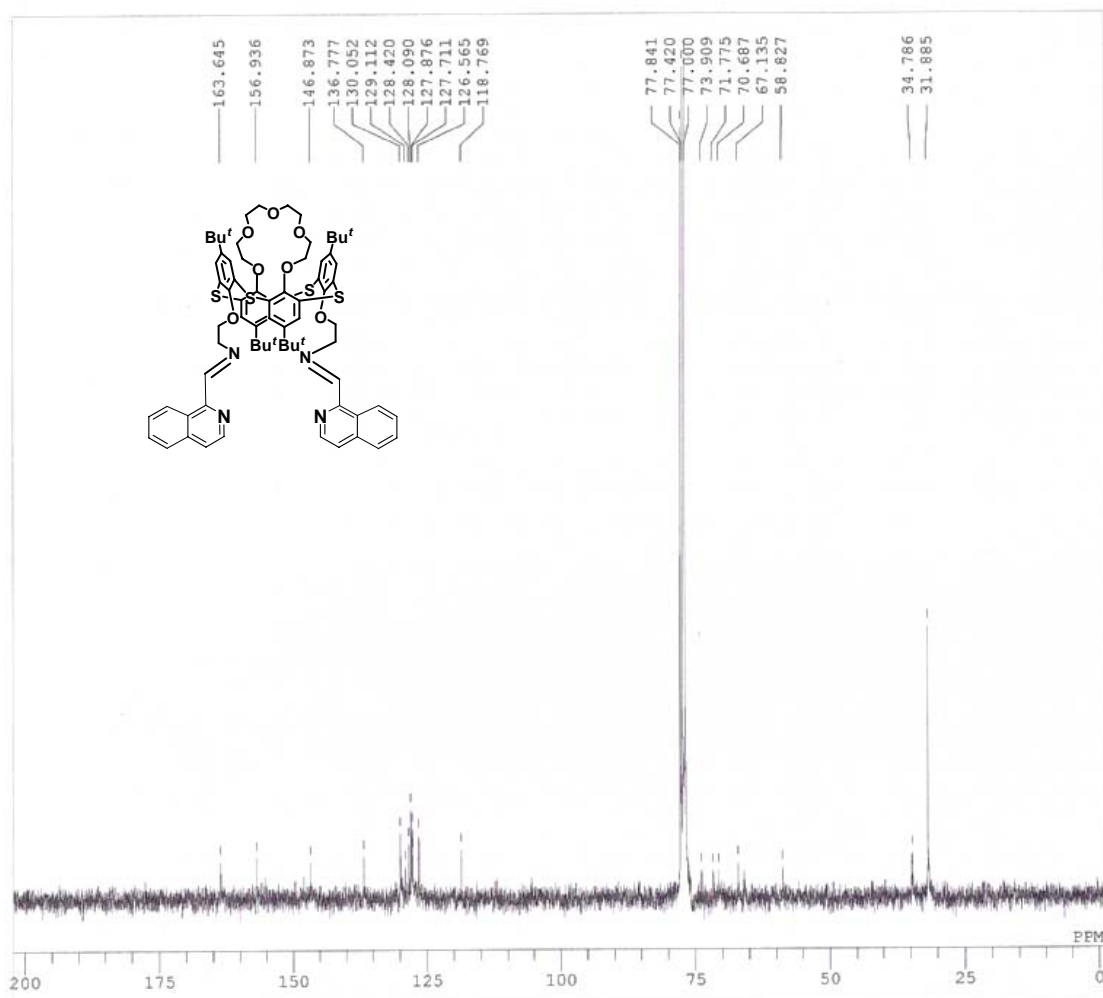

**Figure S23. Mass Spectrum of 5**

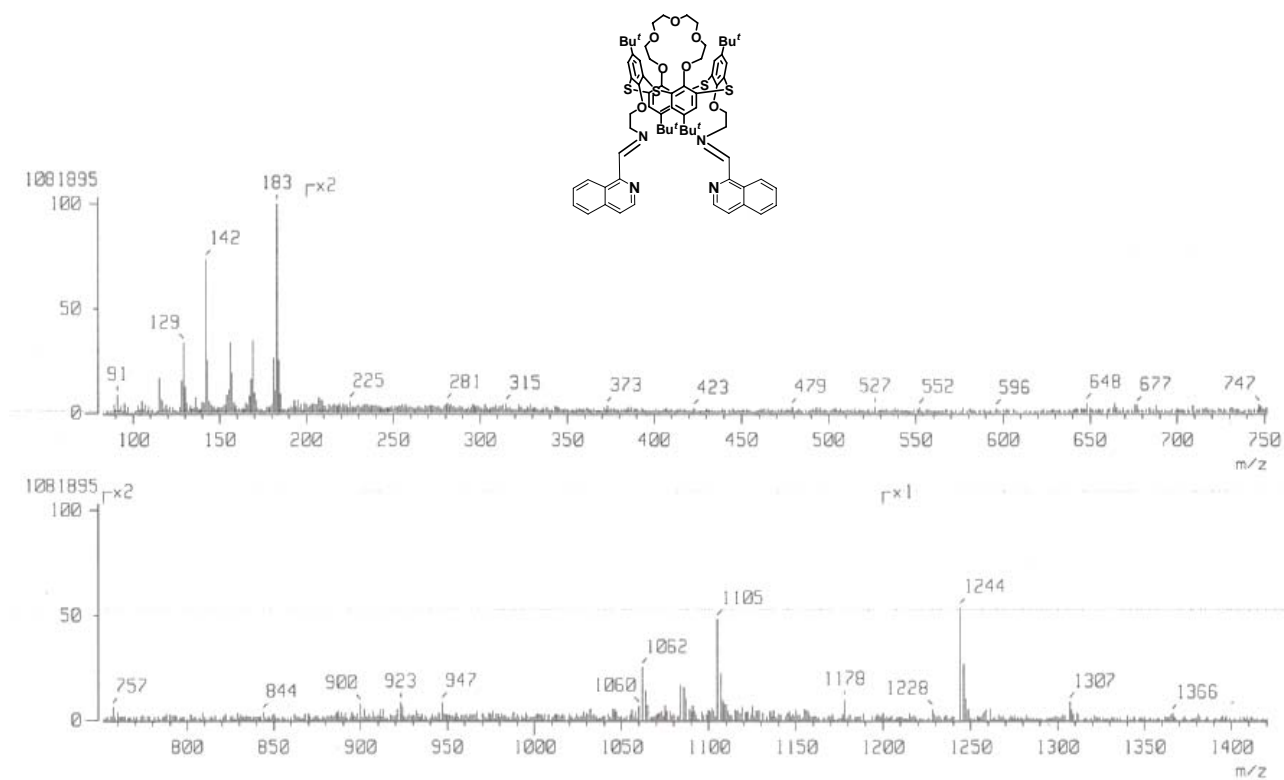

Figure S24.  $^1\text{H}$  NMR Spectrum of **7**

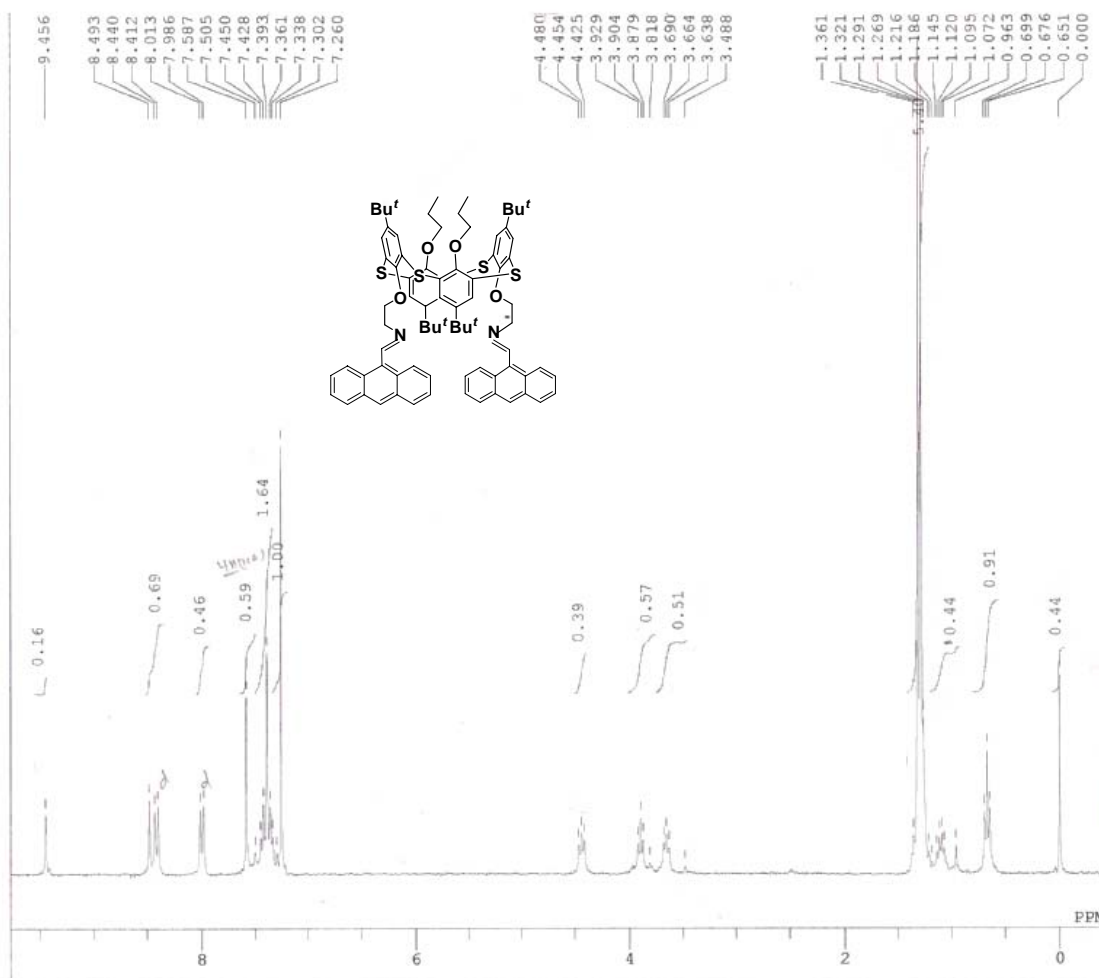

**Figure S25. Mass Spectrum of 7**

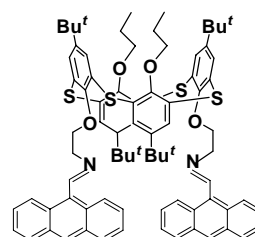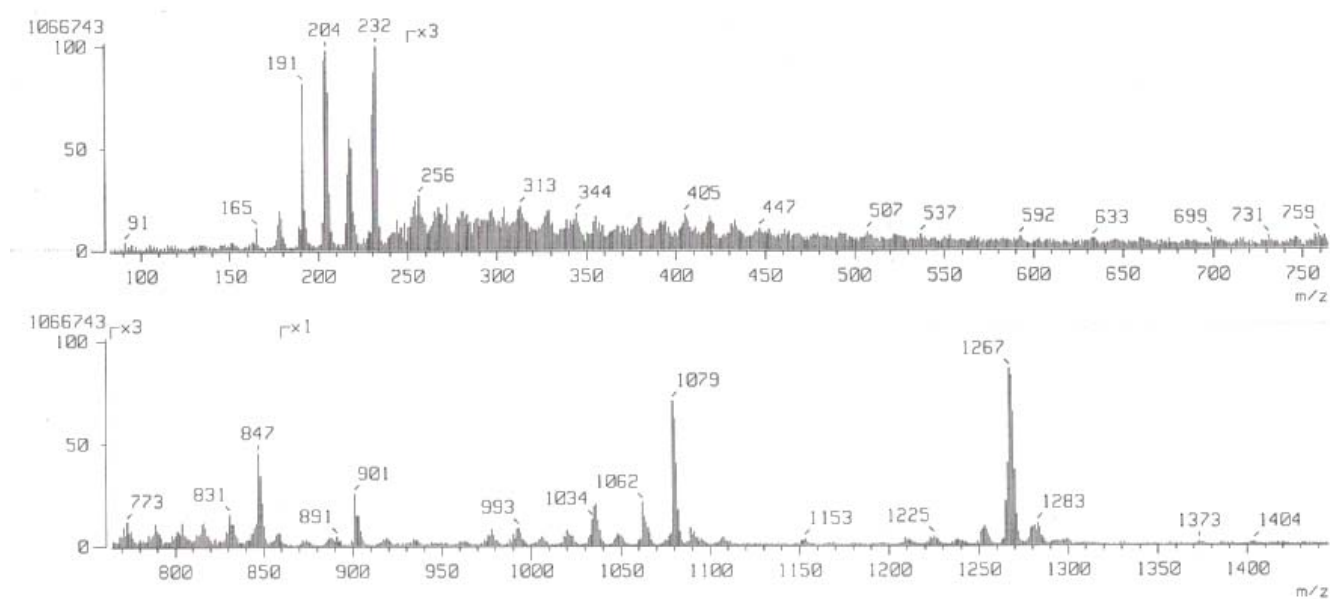

Figure S26.  $^1\text{H}$  NMR Spectrum of **8**

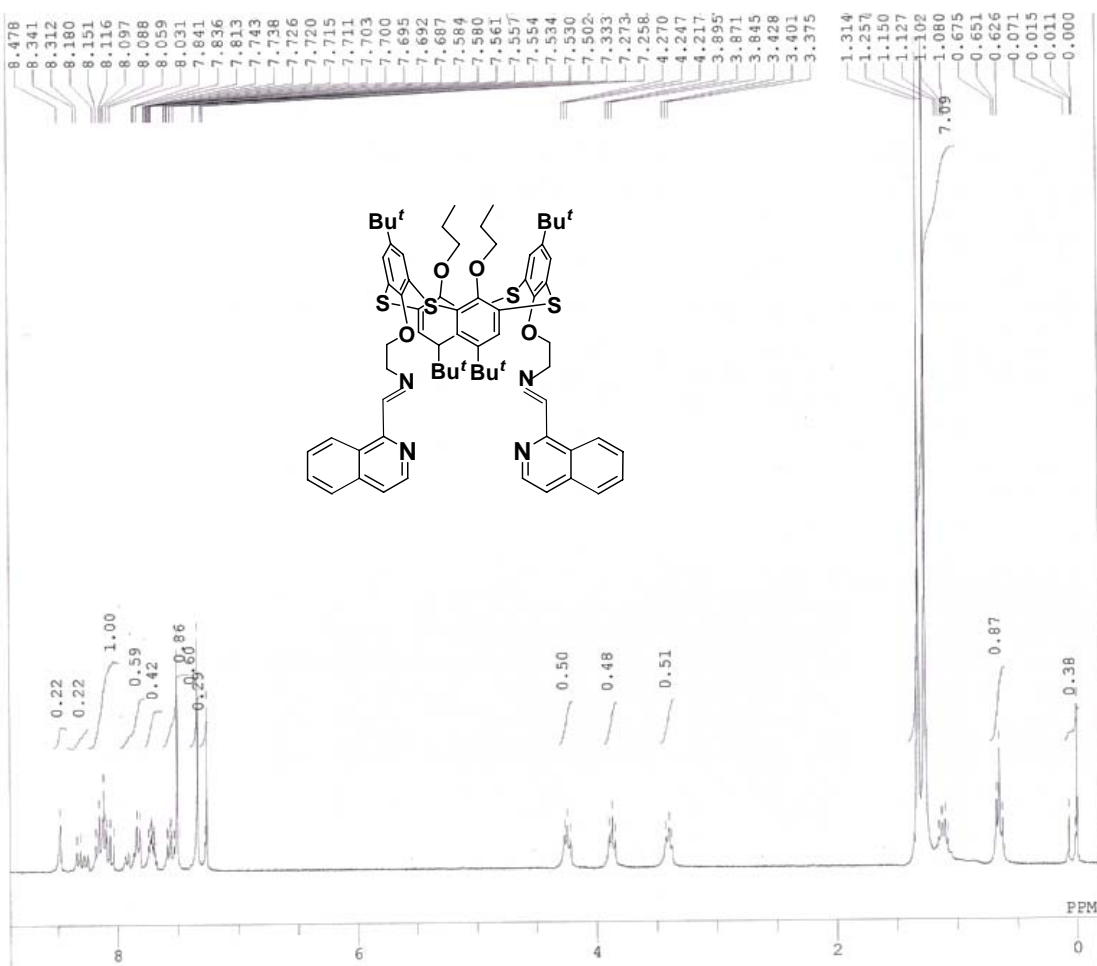

**Figure S27. Mass Spectrum of 8**

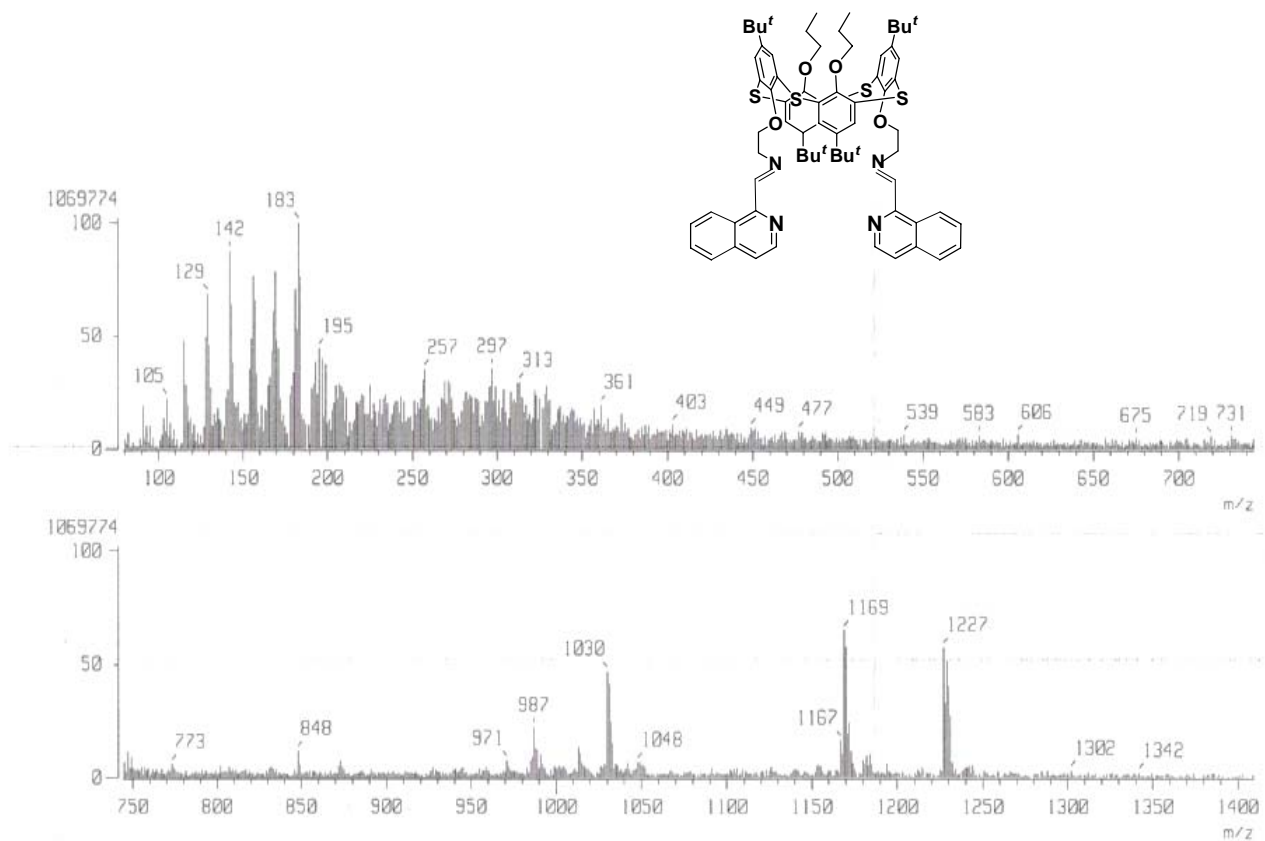

Figure S28. IR Spectrum of 4

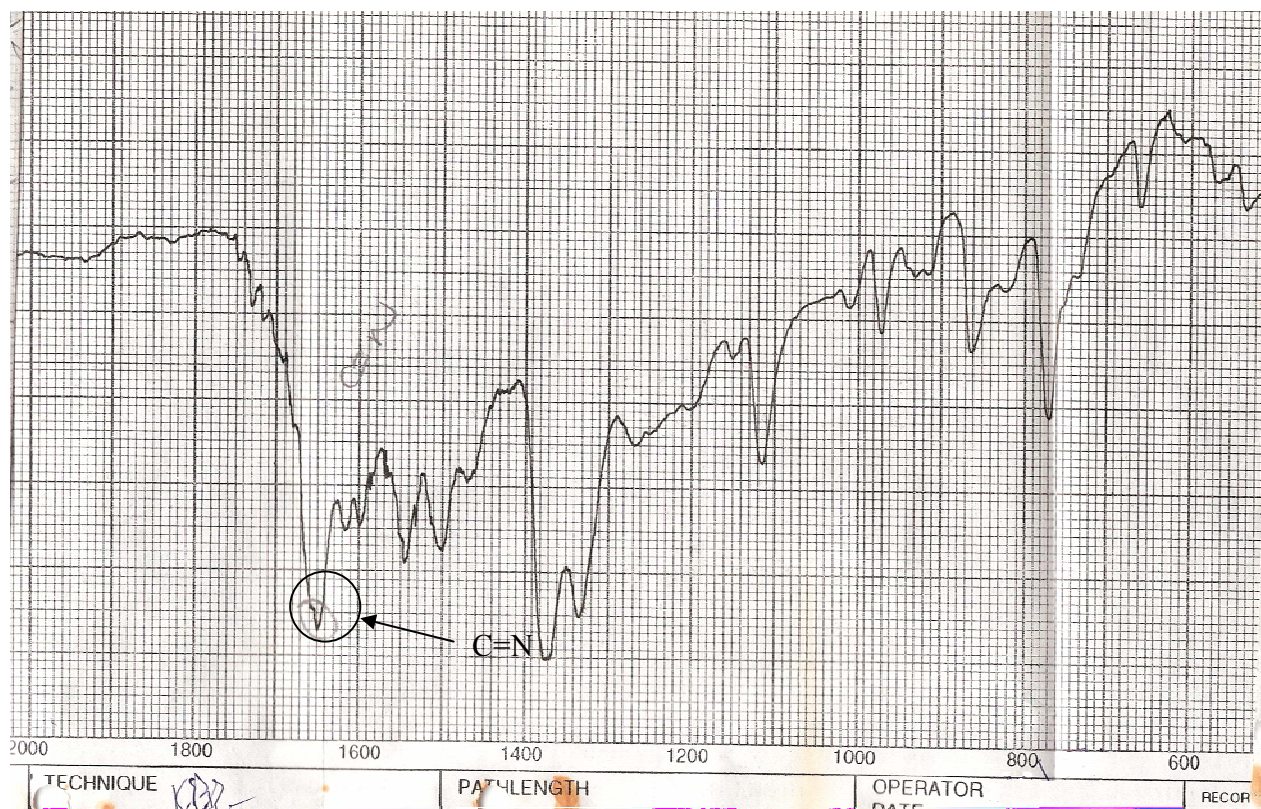

**Figure S29. IR Spectrum of 5**

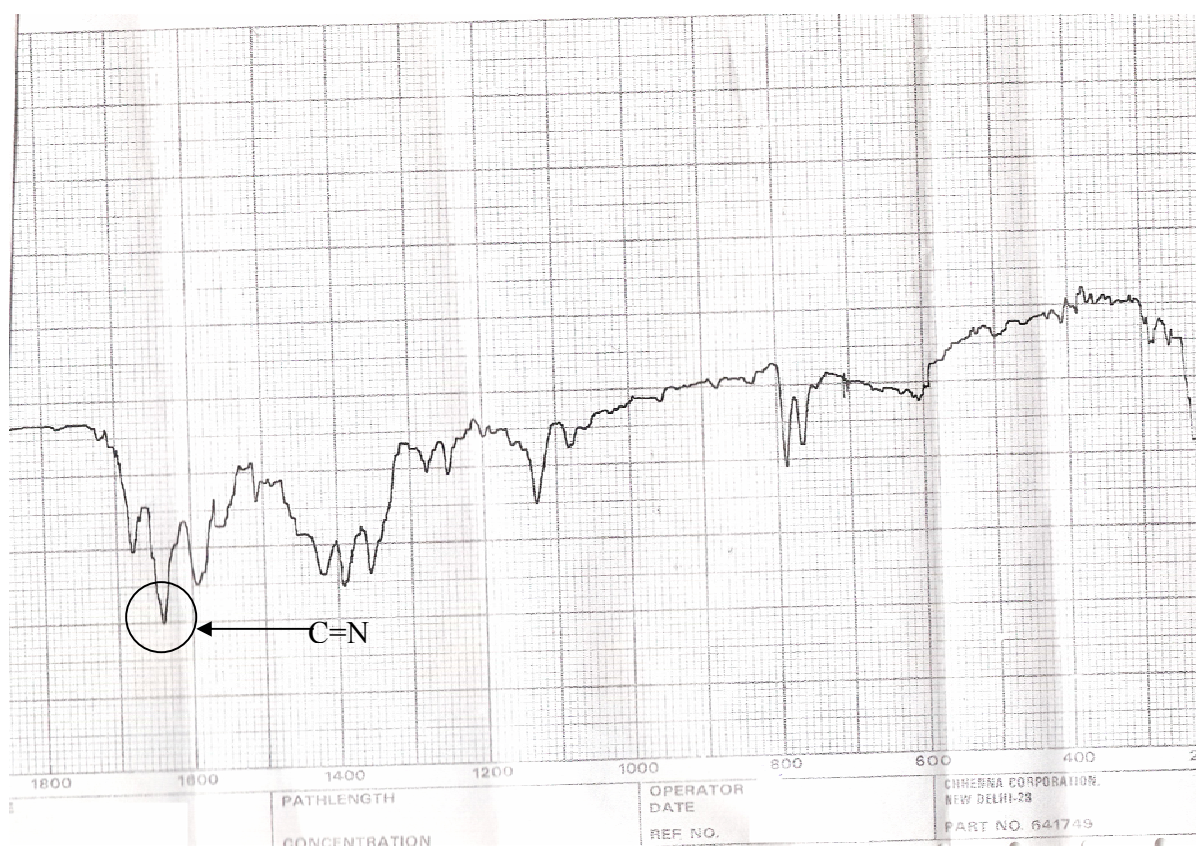



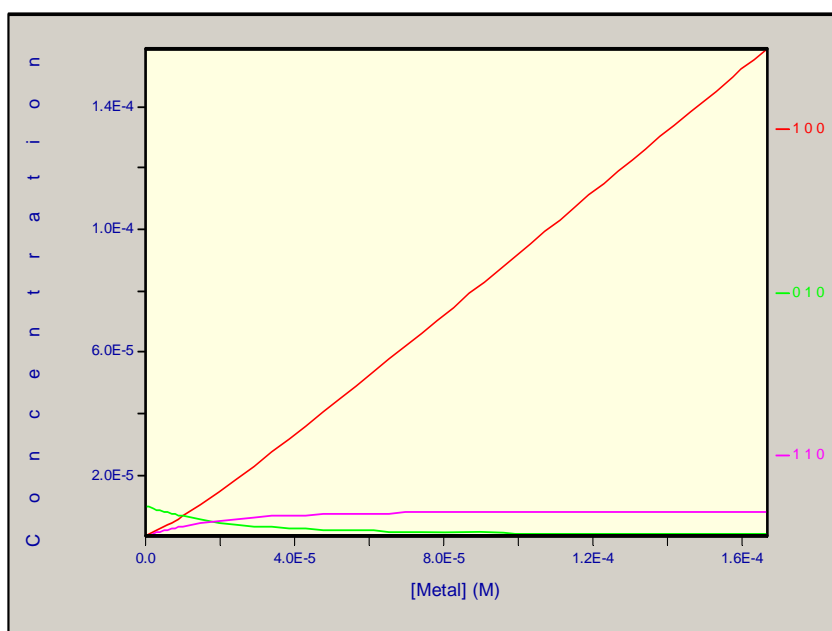

**Figure S30. Concentration plot for 4.Fe<sup>3+</sup> obtained from SPECFIT.**

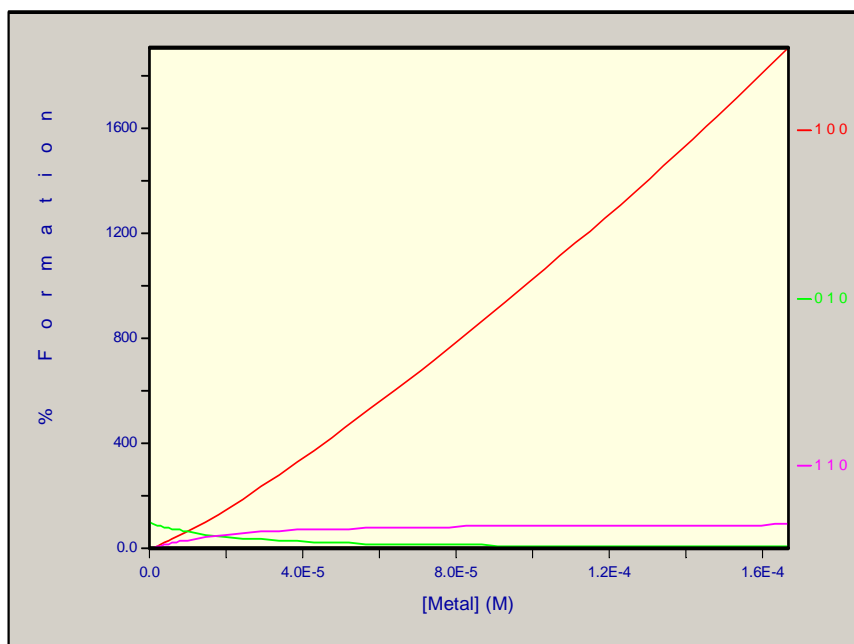

**Figure S31. Percent complex formation plot of 4.Fe<sup>3+</sup> for obtained from SPECFIT.**

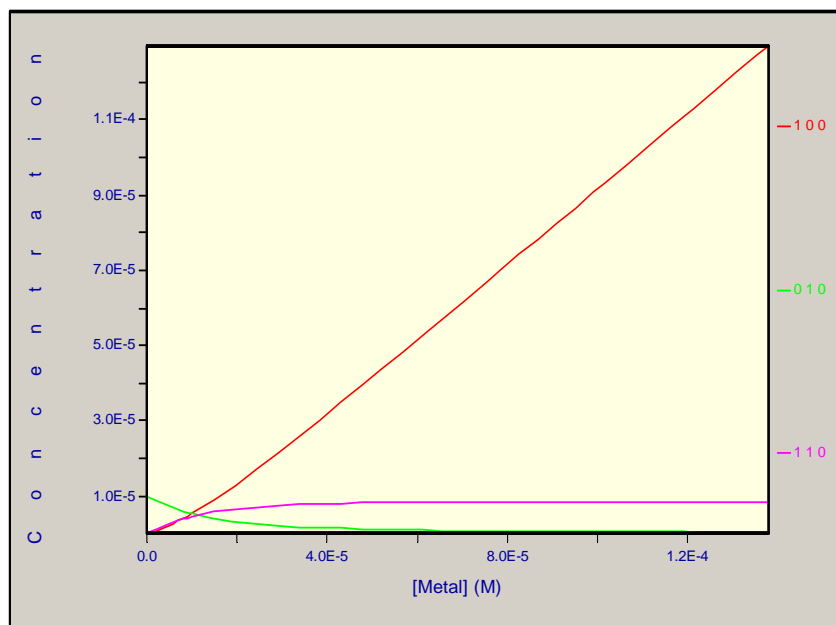

**Figure S32. Concentration plot for 5.Hg<sup>2+</sup> obtained from SPECFIT.**

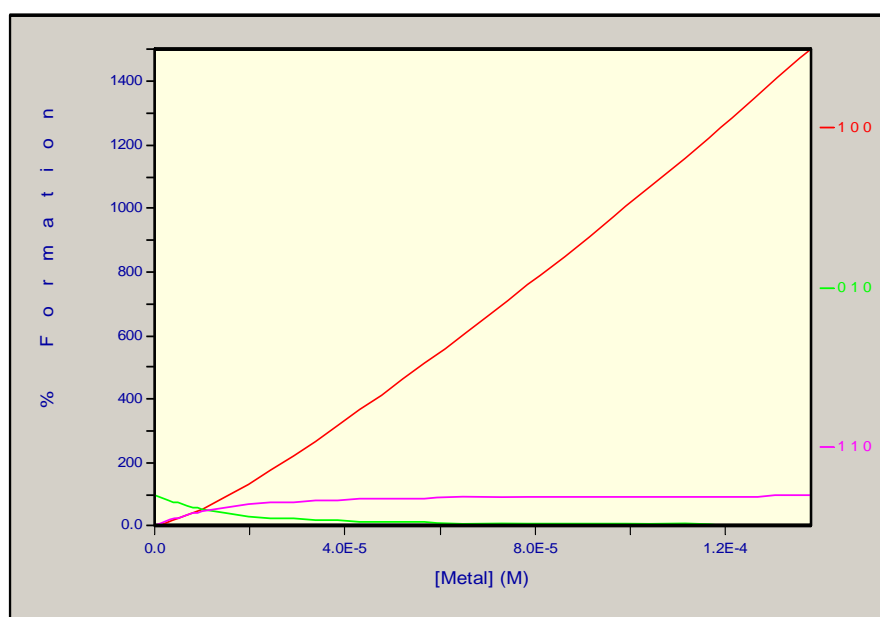

**Figure S33. Percent complex formation lot for 5.Hg<sup>2+</sup> obtained from SPECFIT.**

**Table S1 for Quantum Yield.**

|                                  | Absorbance<br>taken for QY<br>at excitation<br>wavelength<br>$A_s$ | Qy<br>of Sample<br>$(\phi_s)$ |
|----------------------------------|--------------------------------------------------------------------|-------------------------------|
| <b>4 in free state</b>           | <b>0.088</b>                                                       | <b>0.013</b>                  |
| <b>4.Fe<sup>3+</sup> complex</b> | <b>0.061</b>                                                       | <b>0.094</b>                  |
| <b>5 in free state</b>           | <b>0.065</b>                                                       | <b>0.023</b>                  |
| <b>5.Hg<sup>2+</sup> complex</b> | <b>0.063</b>                                                       | <b>0.188</b>                  |

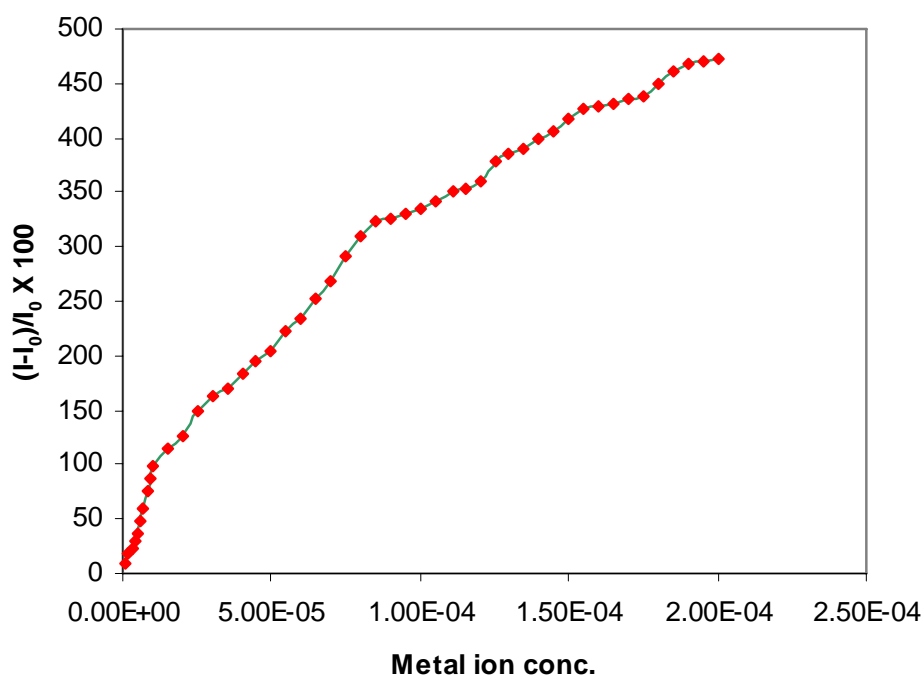

Figure S34. Curve fitting for 4.Fe<sup>3+</sup> complex with respect to experimental data.

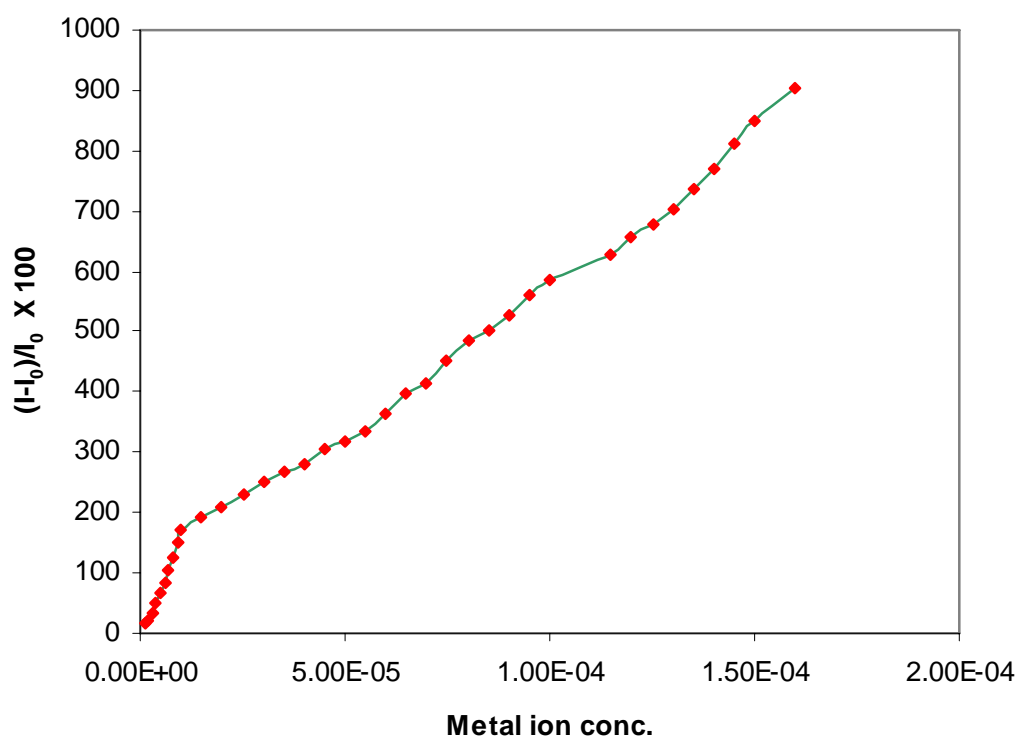

Figure S35. Curve fitting for 5.Hg<sup>2+</sup> complex with respect to experimental data.
